# Supplementary material for: Automated quantum chemistry for estimating nucleophilicity and electrophilicity with applications to retrosynthesis and covalent inhibitors
Source: Royal Society of Chemistry journal article supplement (doi:10.1039/d3dd00224a), 2024-01-01
Supplement: d3dd00224a1.pdf [file d3dd00224a1.pdf]

---

# Supporting Information

Automated Quantum Chemistry for Estimating  
Nucleophilicity and Electrophilicity with Applications to  
Retrosynthesis and Covalent Inhibitors

Nicolai Ree,<sup>†</sup> Andreas H. Göller,<sup>\*,‡</sup> and Jan H. Jensen<sup>\*,†</sup>

<sup>†</sup>*Department of Chemistry, University of Copenhagen, Universitetsparken 5,  
2100 Copenhagen Ø, Denmark*

<sup>‡</sup>*Bayer AG, Pharmaceuticals, R&D, Computational Molecular Design,  
42096 Wuppertal, Germany*

E-mail: andreas.goeller@bayer.com; jhjensen@chem.ku.dk

---

## Overview of the QM-based workflow:

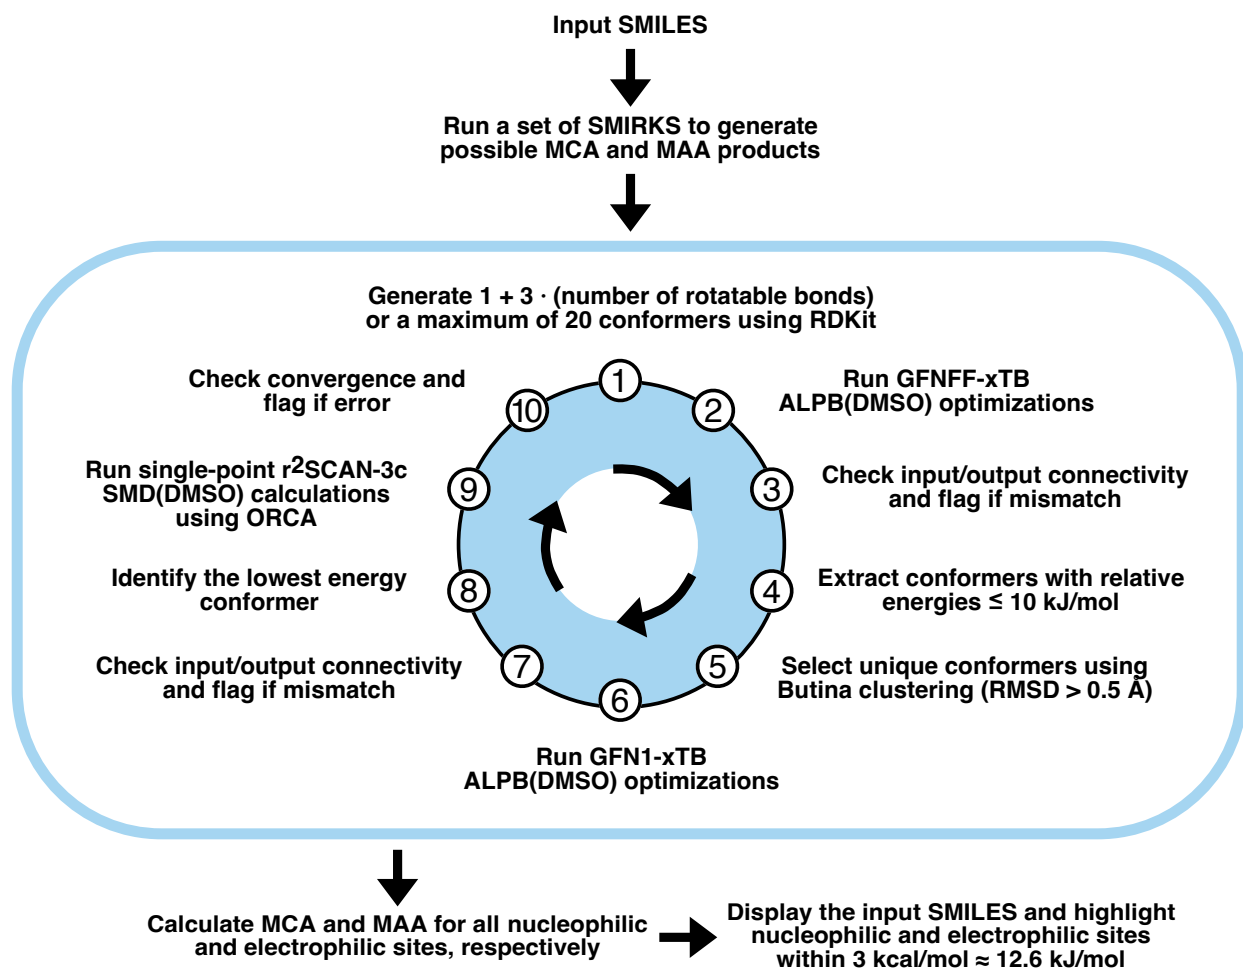

Figure S1: Flowchart describing the automated QM-based workflow for identifying possible nucleophilic and electrophilic sites and computing methyl cation affinities (MCAs) and methyl anion affinities (MAAs) to quantify nucleophilicity and electrophilicity, respectively. An example of the visual output can be seen in Figure S3.

## Results of QM-based workflow w/o DFT single-point calculations:

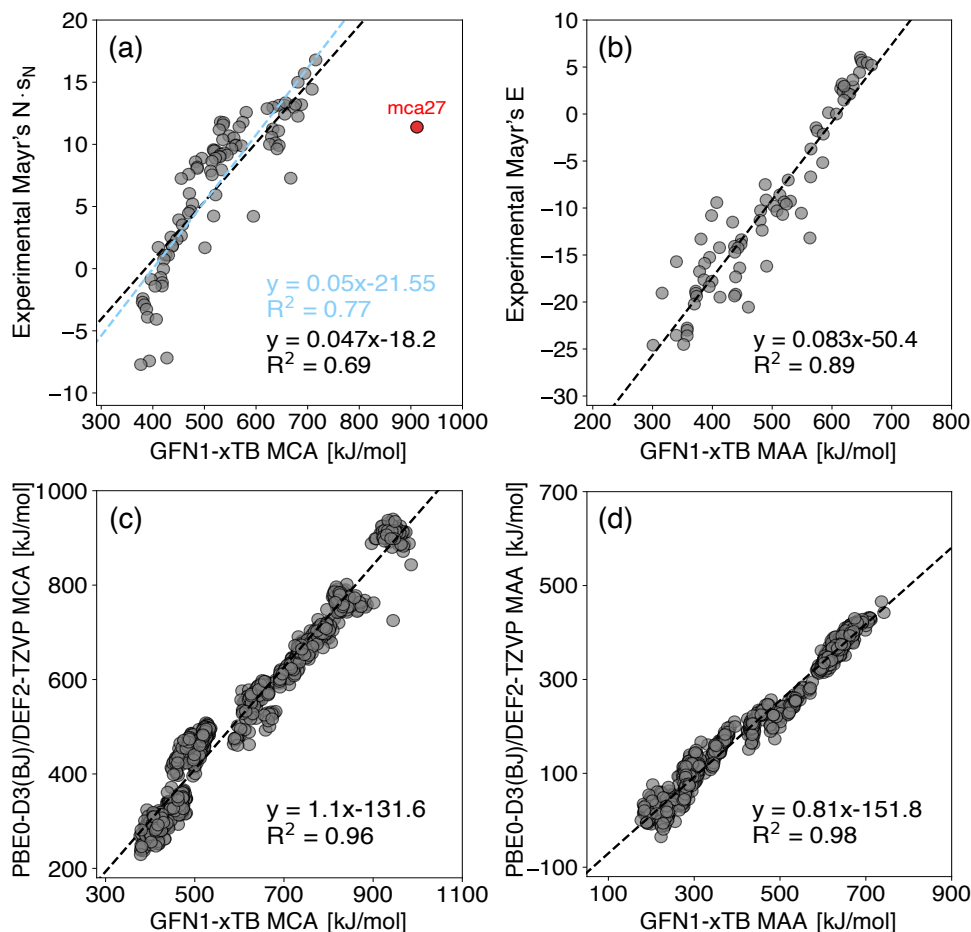

Figure S2: Correlation plots between (a) experimental Mayr's  $N \cdot s_N$  and calculated MCAs, (b) experimental Mayr's E and calculated MAAs, (c) calculated MCAs at different levels of theory, and (d) calculated MAAs at different levels of theory. Calculations on the x- and y-axes are performed at the GFN1-xTB ALPB(DMSO) and PBE0-D3(BJ)/DEF2-TZVP COSMO( $\infty$ ) level of theory, respectively. The black regression lines consider all points, whereas the blue regression line omits compound mca27 (cyanide: [C-]#N).

## Chemical selectivity predictions for Raltegravir:

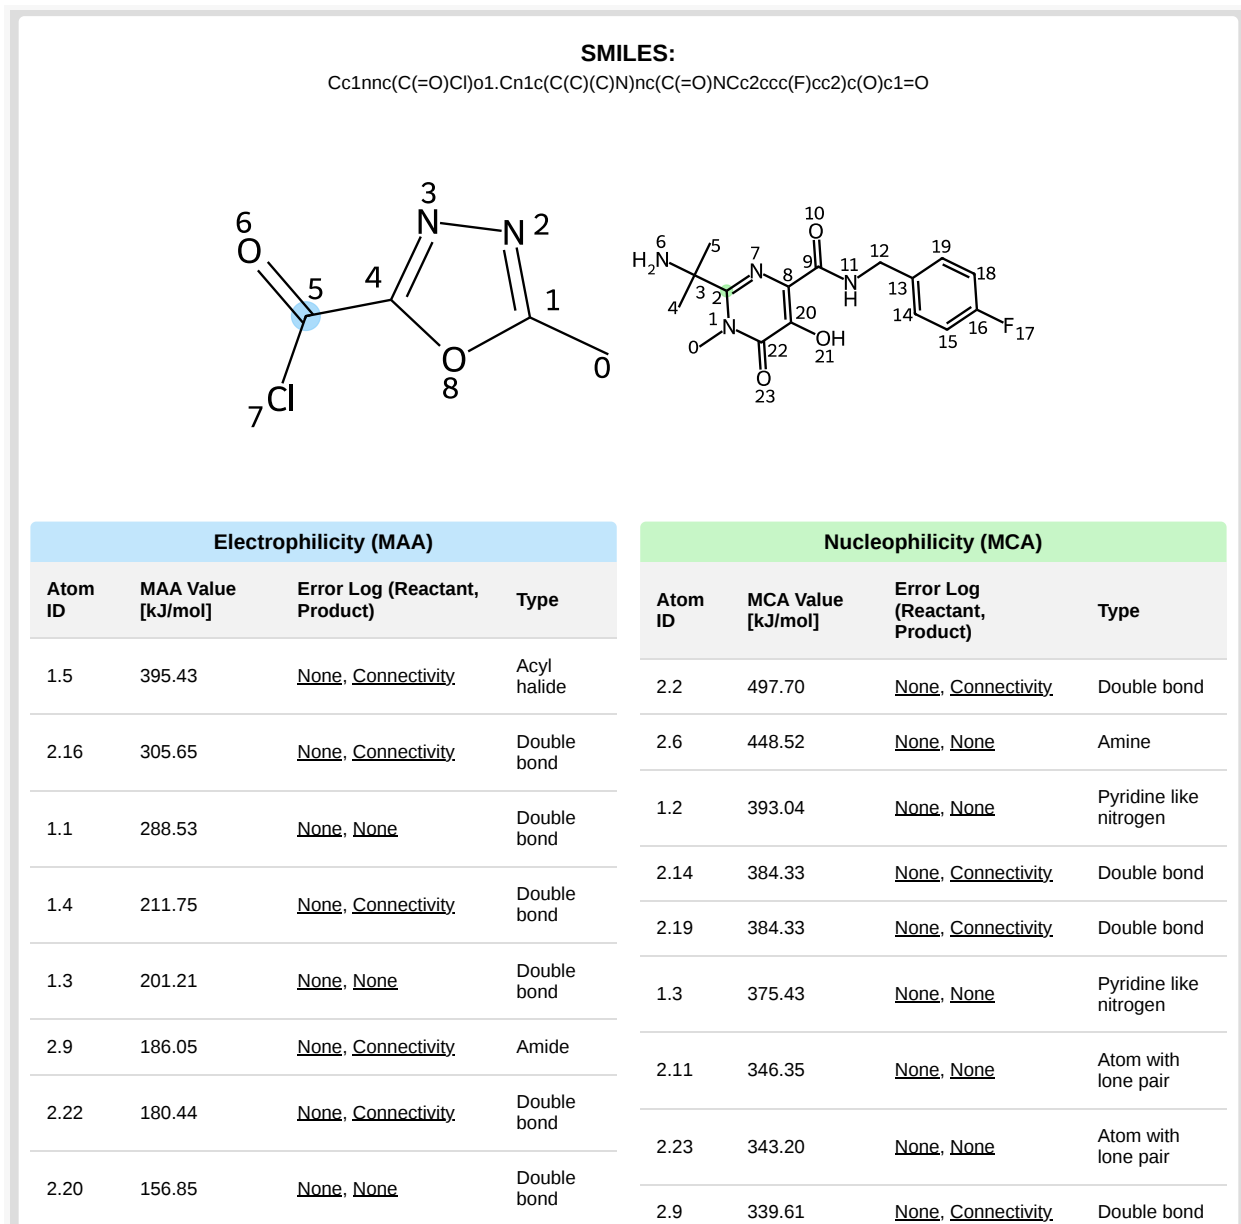

Figure S3: Chemical selectivity predictions in the synthesis of Raltegravir. Electrophilic and nucleophilic sites with MAAs and MCAs within 3 kcal/mol  $\approx$  12.6 kJ/mol are highlighted in blue and green, respectively. The MAAs and MCAs are obtained at the  $r^2$ SCAN-3c SMD(DMSO)//GFN1-xTB ALPB(DMSO) level of theory. Atom site 2.2 has a connectivity failure for the MCA product corresponding to the  $-C^+(CH_3)(CH_3)NH_2$  group being detached from the ring, as the  $CH_3^+$  takes its position. Hence, atom site 2.6 is the most nucleophilic site.

|      |        |                           |             |      |        |                           |                        |
|------|--------|---------------------------|-------------|------|--------|---------------------------|------------------------|
| 2.2  | 151.45 | <u>None, None</u>         | Double bond | 2.7  | 333.88 | <u>None, None</u>         | Pyridine like nitrogen |
| 1.6  | 129.58 | <u>None, None</u>         | Double bond | 2.21 | 329.96 | <u>None, Connectivity</u> | Phenol                 |
| 1.2  | 111.14 | <u>None, Connectivity</u> | Double bond | 2.10 | 323.50 | <u>None, None</u>         | Amide                  |
| 2.8  | 106.81 | <u>None, None</u>         | Double bond | 2.15 | 299.03 | <u>None, None</u>         | Double bond            |
| 2.14 | 97.80  | <u>None, None</u>         | Double bond | 2.18 | 299.03 | <u>None, None</u>         | Double bond            |
| 2.19 | 97.80  | <u>None, None</u>         | Double bond | 2.13 | 293.56 | <u>None, None</u>         | Double bond            |
| 2.15 | 76.75  | <u>None, None</u>         | Double bond | 2.22 | 289.71 | <u>None, Connectivity</u> | Double bond            |
| 2.18 | 76.75  | <u>None, None</u>         | Double bond | 2.20 | 282.17 | <u>None, None</u>         | Double bond            |
| 2.13 | 60.26  | <u>None, None</u>         | Double bond | 2.8  | 278.52 | <u>None, None</u>         | Double bond            |
| 2.23 | 0.64   | <u>None, None</u>         | Double bond | 2.1  | 261.22 | <u>None, None</u>         | Atom with lone pair    |
| 2.7  | 0.43   | <u>None, None</u>         | Double bond | 2.16 | 256.31 | <u>None, None</u>         | Double bond            |
| 2.10 | -9.56  | <u>None, None</u>         | Double bond | 1.6  | 243.13 | <u>None, None</u>         | Atom with lone pair    |
|      |        |                           |             | 1.4  | 233.88 | <u>None, None</u>         | Double bond            |
|      |        |                           |             | 1.1  | 179.15 | <u>None, None</u>         | Double bond            |
|      |        |                           |             | 1.7  | 176.05 | <u>None, None</u>         | Atom with lone pair    |
|      |        |                           |             | 1.5  | 158.16 | <u>None, Connectivity</u> | Double bond            |
|      |        |                           |             | 1.8  | 137.65 | <u>None, None</u>         | Ether                  |
|      |        |                           |             | 2.17 | 130.80 | <u>None, None</u>         | Atom with lone pair    |

Figure S3: Continued.

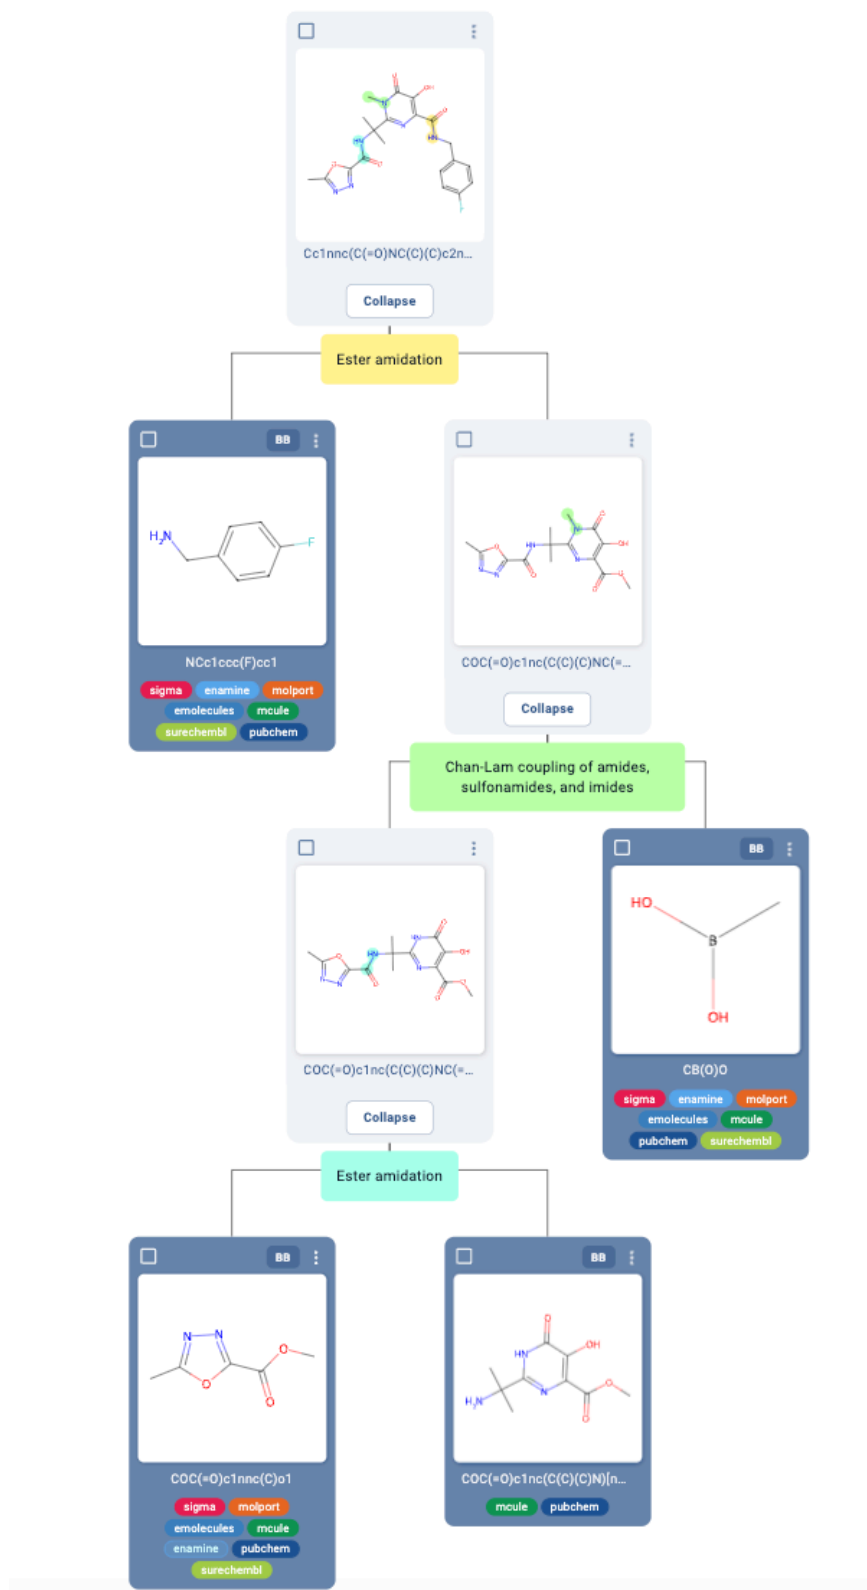

Figure S4: Retrosynthetic route for synthesizing Raltegravir predicted by Manifold from PostEra.

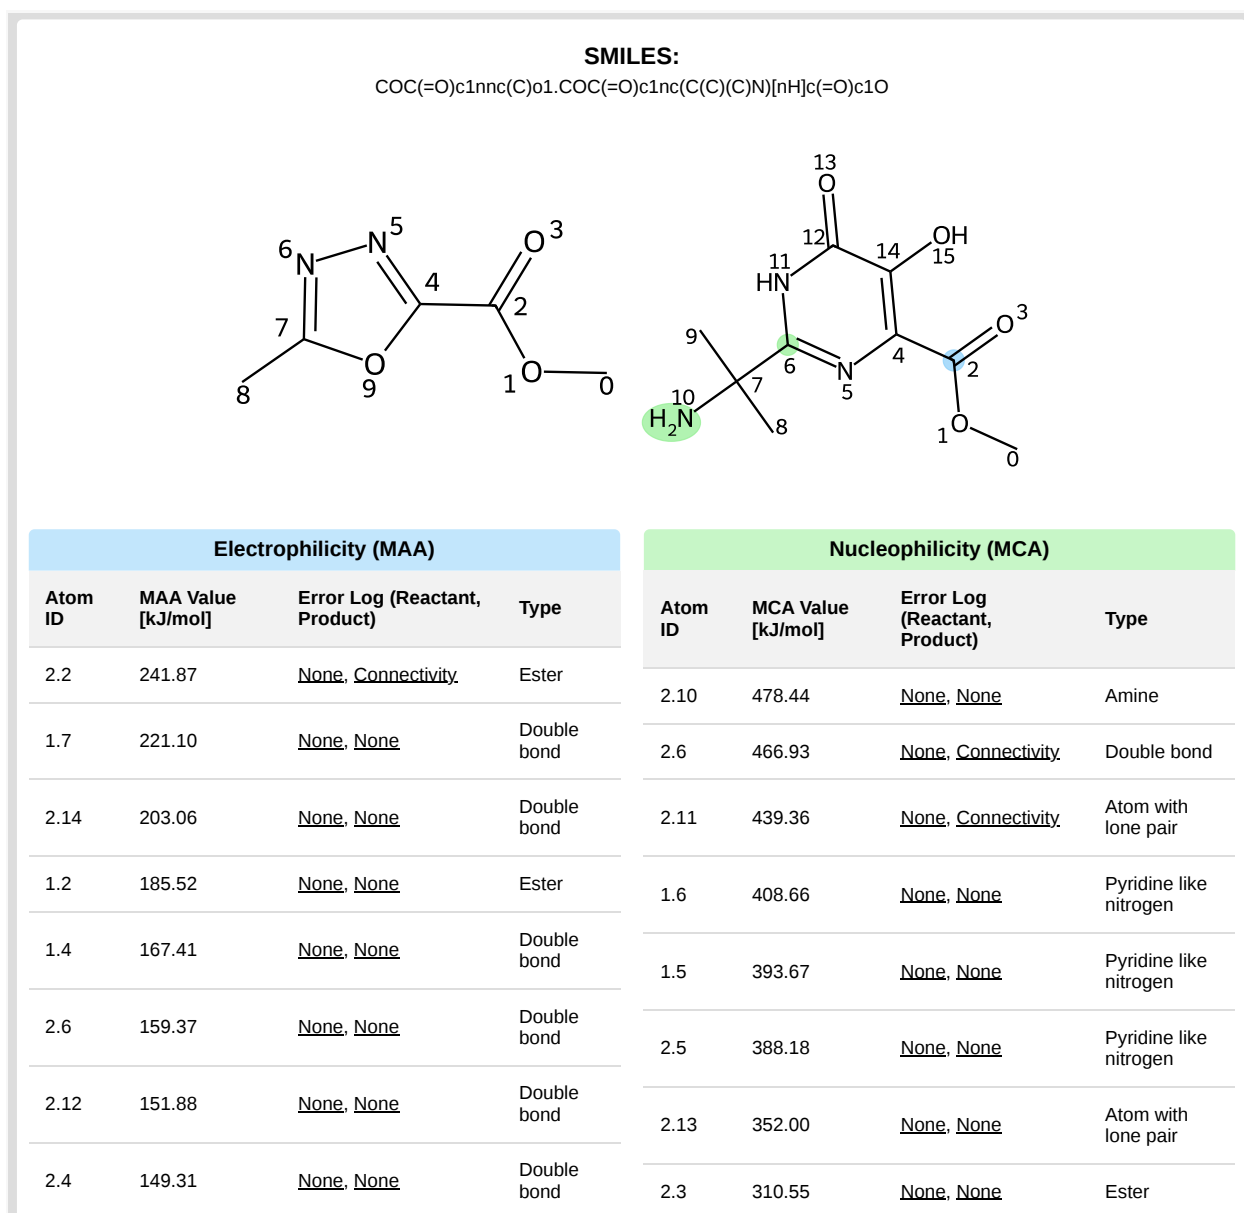

Figure S5: Calculated MAAs and MCAs for the first reaction step in the retrosynthetic route by Manifold (see Figure S4). The MAAs and MCAs are obtained at the r<sup>2</sup>SCAN-3c SMD(DMSO)//GFN1-xTB ALPB(DMSO) level of theory.

|      |        |                   |             |      |        |                           |                     |
|------|--------|-------------------|-------------|------|--------|---------------------------|---------------------|
| 1.5  | 91.82  | <u>None, None</u> | Double bond | 2.15 | 301.03 | <u>None, Connectivity</u> | Phenol              |
| 2.13 | 28.99  | <u>None, None</u> | Double bond | 2.12 | 300.48 | <u>None, Connectivity</u> | Double bond         |
| 1.3  | 26.07  | <u>None, None</u> | Double bond | 2.14 | 300.24 | <u>None, Connectivity</u> | Double bond         |
| 2.3  | 12.72  | <u>None, None</u> | Double bond | 2.2  | 296.71 | <u>None, Connectivity</u> | Double bond         |
| 2.5  | -10.35 | <u>None, None</u> | Double bond | 2.4  | 272.02 | <u>None, None</u>         | Double bond         |
| 1.6  | -27.10 | <u>None, None</u> | Double bond | 1.3  | 271.56 | <u>None, None</u>         | Ester               |
|      |        |                   |             | 1.2  | 268.66 | <u>None, Connectivity</u> | Double bond         |
|      |        |                   |             | 1.4  | 255.16 | <u>None, None</u>         | Double bond         |
|      |        |                   |             | 2.1  | 246.00 | <u>None, None</u>         | Atom with lone pair |
|      |        |                   |             | 1.7  | 206.90 | <u>None, None</u>         | Double bond         |
|      |        |                   |             | 1.1  | 197.01 | <u>None, None</u>         | Atom with lone pair |
|      |        |                   |             | 1.9  | 151.30 | <u>None, None</u>         | Ether               |

Figure S5: Continued.



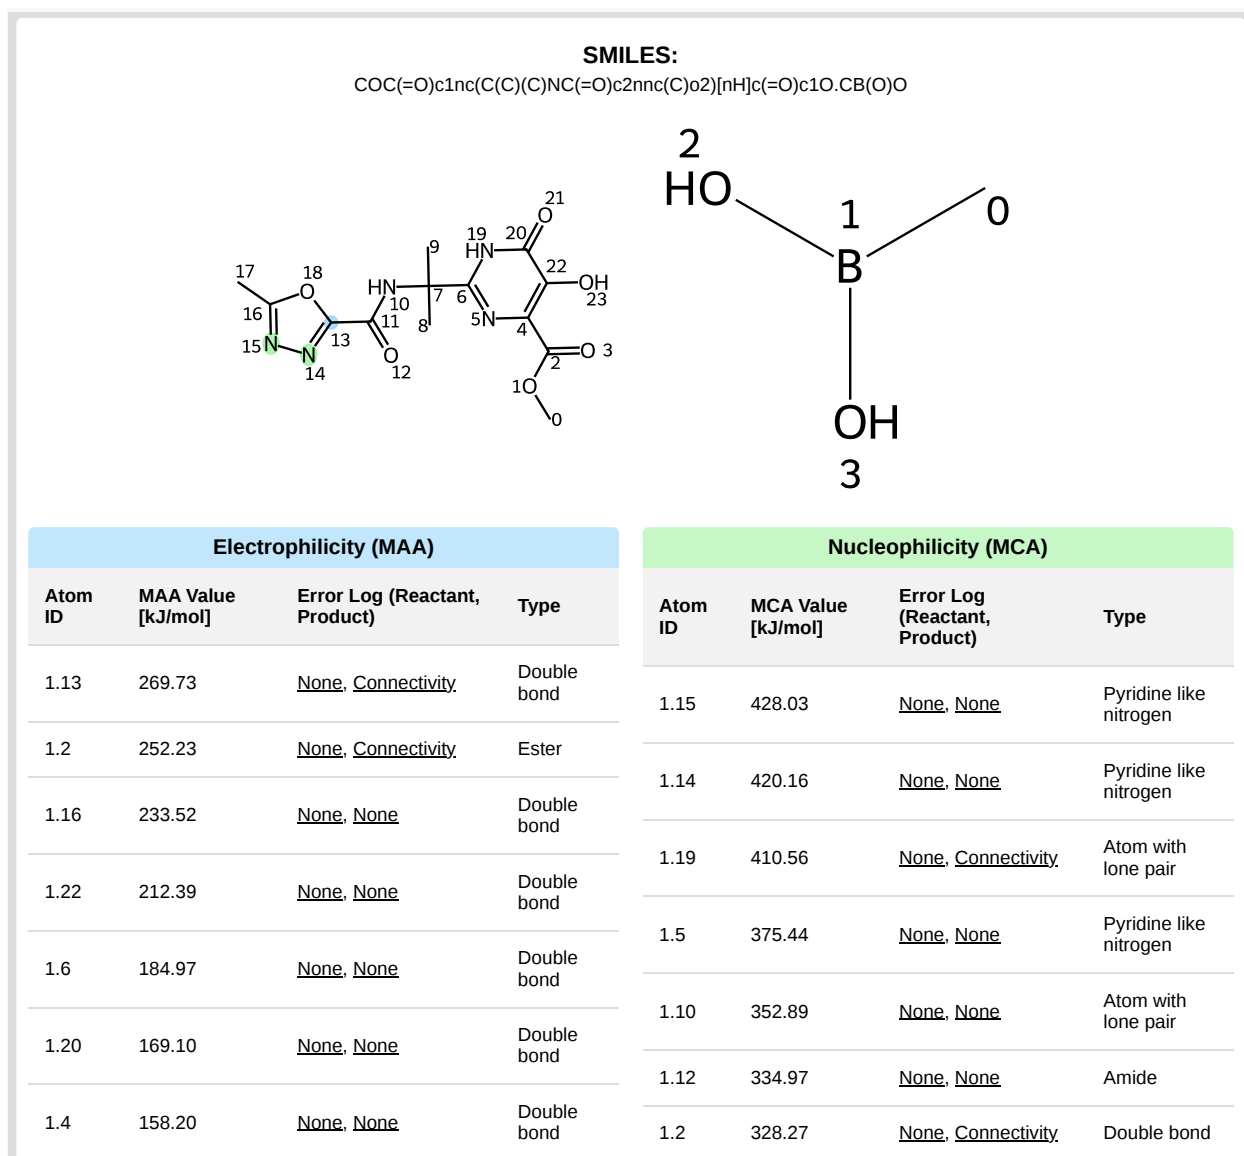

Figure S6: Calculated MAAs and MCAs for the second reaction step in the retrosynthetic route by Manifold (see Figure S4). The MAAs and MCAs are obtained at the r<sup>2</sup>SCAN-3c SMD(DMSO)//GFN1-xTB ALPB(DMSO) level of theory.

|      |        |                           |             |      |        |                           |                     |
|------|--------|---------------------------|-------------|------|--------|---------------------------|---------------------|
| 1.11 | 147.33 | <u>None, Connectivity</u> | Amide       | 1.11 | 325.66 | <u>None, Connectivity</u> | Double bond         |
| 1.14 | 105.53 | <u>None, None</u>         | Double bond | 1.21 | 323.21 | <u>None, None</u>         | Atom with lone pair |
| 1.12 | 62.28  | <u>None, None</u>         | Double bond | 1.3  | 311.41 | <u>None, None</u>         | Ester               |
| 1.21 | 41.41  | <u>None, None</u>         | Double bond | 1.23 | 293.93 | <u>None, Connectivity</u> | Phenol              |
| 1.3  | 26.83  | <u>None, None</u>         | Double bond | 1.13 | 274.10 | <u>None, None</u>         | Double bond         |
| 1.15 | 9.55   | <u>None, None</u>         | Double bond | 1.4  | 269.92 | <u>None, None</u>         | Double bond         |
| 1.5  | -18.58 | <u>None, None</u>         | Double bond | 2.2  | 269.87 | <u>None, None</u>         | Atom with lone pair |
|      |        |                           |             | 2.3  | 269.87 | <u>None, None</u>         | Atom with lone pair |
|      |        |                           |             | 1.20 | 264.93 | <u>None, Connectivity</u> | Double bond         |
|      |        |                           |             | 1.22 | 262.63 | <u>None, None</u>         | Double bond         |
|      |        |                           |             | 1.6  | 254.13 | <u>None, Connectivity</u> | Double bond         |
|      |        |                           |             | 1.1  | 247.26 | <u>None, None</u>         | Atom with lone pair |
|      |        |                           |             | 1.16 | 241.09 | <u>None, None</u>         | Double bond         |
|      |        |                           |             | 1.18 | 181.68 | <u>None, None</u>         | Ether               |

Figure S6: Continued.

**SMILES:**

NCc1ccc(F)cc1.COC(=O)c1nc(C(C)(C)NC(=O)c2nnc(C)O2)n(C)c(=O)c1O

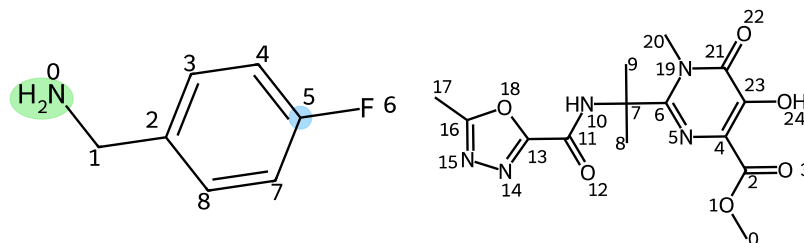

| Electrophilicity (MAA) |                    |                                   |             |
|------------------------|--------------------|-----------------------------------|-------------|
| Atom ID                | MAA Value [kJ/mol] | Error Log (Reactant, Product)     | Type        |
| 1.5                    | 310.44             | <u>None</u> , <u>Connectivity</u> | Double bond |
| 2.2                    | 222.56             | <u>None</u> , <u>Connectivity</u> | Ester       |
| 2.21                   | 196.20             | <u>None</u> , <u>Connectivity</u> | Double bond |
| 2.23                   | 195.82             | <u>None</u> , <u>None</u>         | Double bond |
| 2.16                   | 184.28             | <u>None</u> , <u>None</u>         | Double bond |
| 2.6                    | 173.14             | <u>None</u> , <u>None</u>         | Double bond |
| 2.13                   | 161.22             | <u>None</u> , <u>None</u>         | Double bond |
| 2.4                    | 138.50             | <u>None</u> , <u>None</u>         | Double bond |

| Nucleophilicity (MCA) |                    |                                   |                        |
|-----------------------|--------------------|-----------------------------------|------------------------|
| Atom ID               | MCA Value [kJ/mol] | Error Log (Reactant, Product)     | Type                   |
| 1.0                   | 488.97             | <u>None</u> , <u>None</u>         | Amine                  |
| 2.15                  | 411.26             | <u>None</u> , <u>None</u>         | Pyridine like nitrogen |
| 2.14                  | 403.50             | <u>None</u> , <u>None</u>         | Pyridine like nitrogen |
| 1.2                   | 400.10             | <u>None</u> , <u>Connectivity</u> | Double bond            |
| 2.22                  | 329.57             | <u>None</u> , <u>None</u>         | Atom with lone pair    |
| 2.5                   | 326.60             | <u>None</u> , <u>None</u>         | Pyridine like nitrogen |
| 2.12                  | 319.65             | <u>None</u> , <u>None</u>         | Amide                  |
| 1.5                   | 317.49             | <u>None</u> , <u>Connectivity</u> | Double bond            |
| 1.7                   | 314.44             | <u>None</u> , <u>None</u>         | Double bond            |

Figure S7: Calculated MAAs and MCAs for the third reaction step in the retrosynthetic route by Manifold (see Figure S4). The MAAs and MCAs are obtained at the r<sup>2</sup>SCAN-3c SMD(DMSO)//GFN1-xTB ALPB(DMSO) level of theory.

|      |        |                   |             |      |        |                           |                     |
|------|--------|-------------------|-------------|------|--------|---------------------------|---------------------|
| 2.11 | 110.08 | <u>None, None</u> | Amide       | 1.4  | 314.44 | <u>None, None</u>         | Double bond         |
| 1.8  | 82.22  | <u>None, None</u> | Double bond | 2.10 | 304.59 | <u>None, None</u>         | Atom with lone pair |
| 1.3  | 82.22  | <u>None, None</u> | Double bond | 1.3  | 303.20 | <u>None, None</u>         | Double bond         |
| 1.4  | 71.43  | <u>None, None</u> | Double bond | 1.8  | 303.20 | <u>None, None</u>         | Double bond         |
| 1.7  | 71.43  | <u>None, None</u> | Double bond | 2.3  | 298.20 | <u>None, None</u>         | Ester               |
| 1.2  | 55.35  | <u>None, None</u> | Double bond | 2.21 | 289.68 | <u>None, Connectivity</u> | Double bond         |
| 2.14 | 42.93  | <u>None, None</u> | Double bond | 2.2  | 285.58 | <u>None, Connectivity</u> | Double bond         |
| 2.22 | 24.46  | <u>None, None</u> | Double bond | 2.23 | 272.59 | <u>None, Connectivity</u> | Double bond         |
| 2.5  | 10.16  | <u>None, None</u> | Double bond | 2.13 | 270.05 | <u>None, None</u>         | Double bond         |
| 2.12 | 4.25   | <u>None, None</u> | Double bond | 2.24 | 268.37 | <u>None, Connectivity</u> | Phenol              |
| 2.15 | -3.30  | <u>None, None</u> | Double bond | 2.4  | 256.98 | <u>None, None</u>         | Double bond         |
| 2.3  | -4.51  | <u>None, None</u> | Double bond | 2.11 | 242.67 | <u>None, Connectivity</u> | Double bond         |
|      |        |                   |             | 2.6  | 240.50 | <u>None, Connectivity</u> | Double bond         |
|      |        |                   |             | 2.1  | 239.26 | <u>None, None</u>         | Atom with lone pair |
|      |        |                   |             | 2.19 | 229.57 | <u>None, None</u>         | Atom with lone pair |
|      |        |                   |             | 2.16 | 225.10 | <u>None, None</u>         | Double bond         |
|      |        |                   |             | 2.18 | 150.97 | <u>None, None</u>         | Ether               |
|      |        |                   |             | 1.6  | 143.47 | <u>None, None</u>         | Atom with lone pair |

Figure S7: Continued.

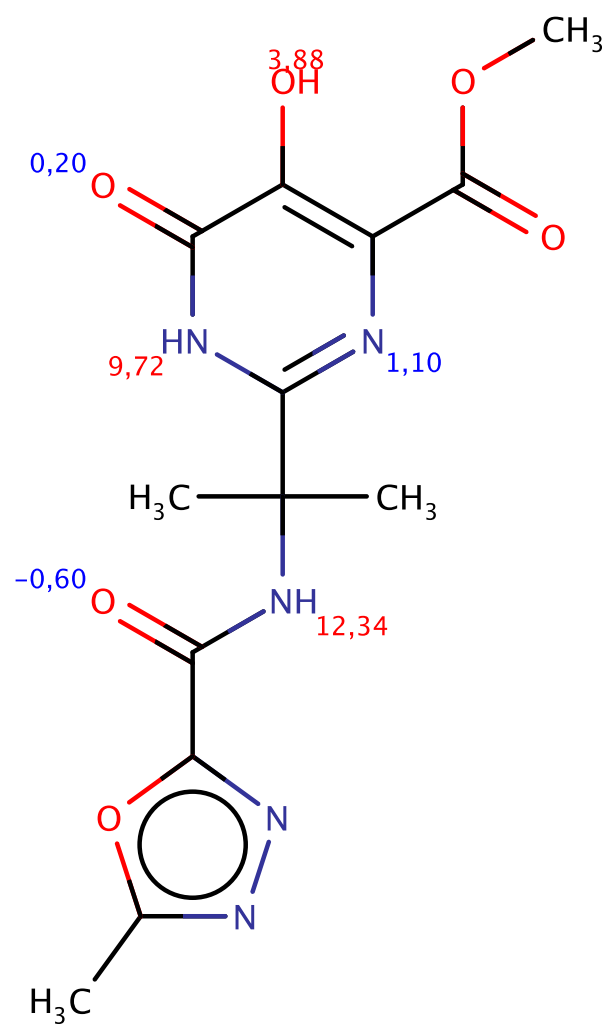

Figure S8: Predicted pKa values for the first reactant in the second reaction step of the retrosynthetic route by Manifold (see Figure S4). The predicted pKa values are obtained using MarvinSketch.

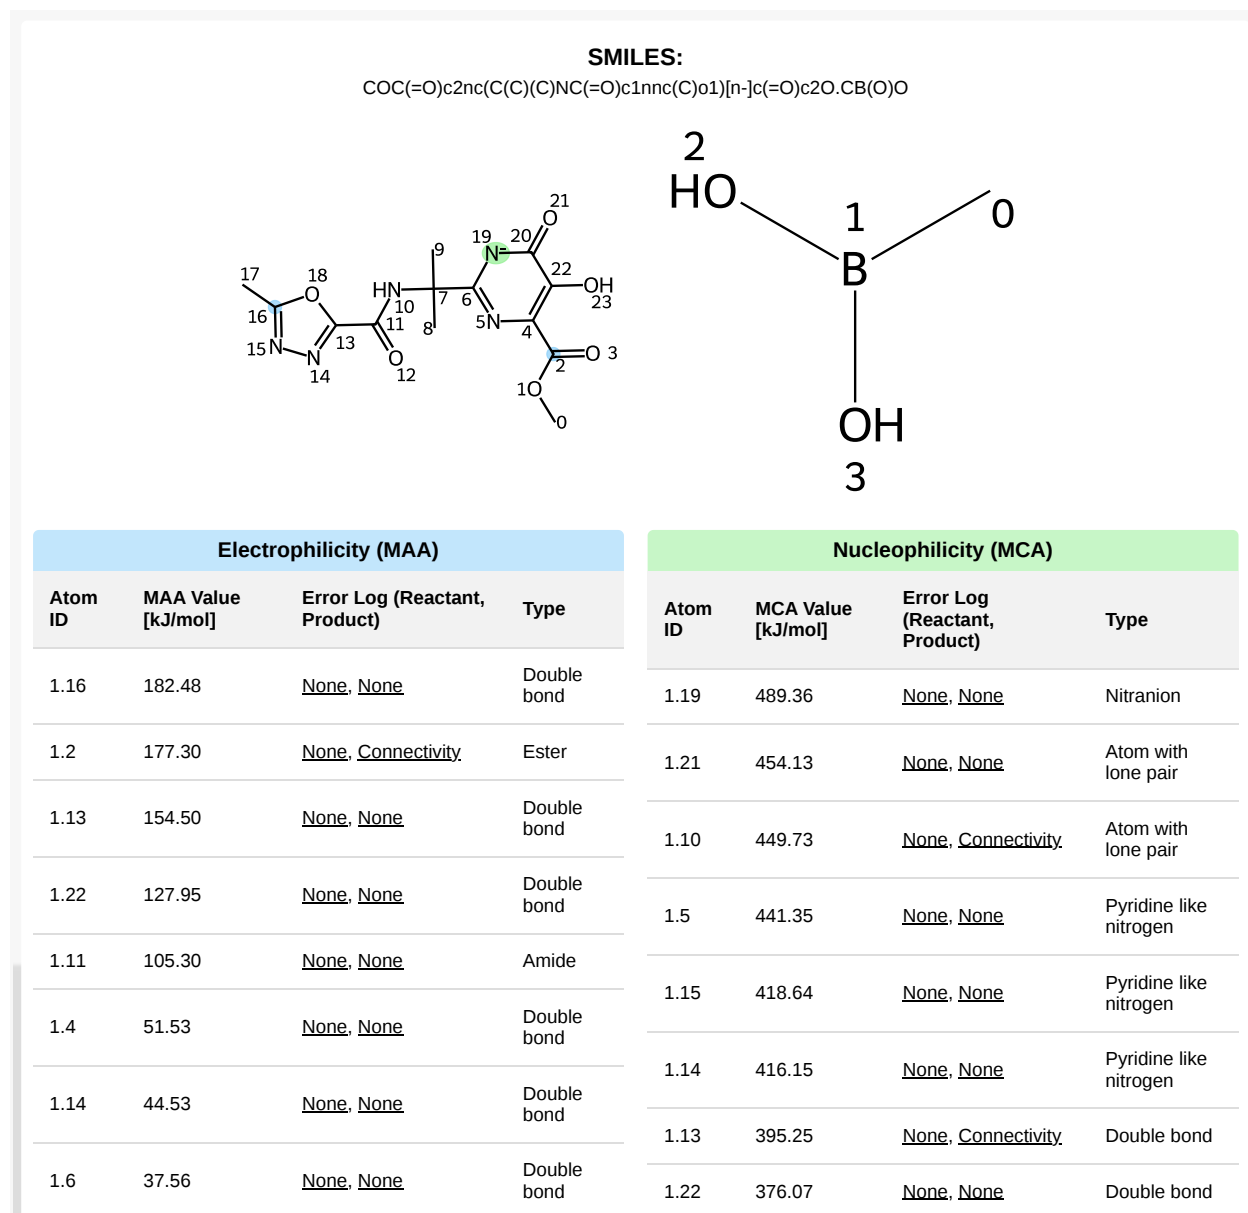

Figure S9: Calculated MAAs and MCAs for the second reaction step in the retrosynthetic route by Manifold (see Figure S4). The atom site 1.19 is deprotonated compared to Figure S6. The MAAs and MCAs are obtained at the r<sup>2</sup>SCAN-3c SMD(DMSO)//GFN1-xTB ALPB(DMSO) level of theory.

|      |        |                   |             |      |        |                           |                     |
|------|--------|-------------------|-------------|------|--------|---------------------------|---------------------|
| 1.20 | 34.50  | <u>None, None</u> | Double bond | 1.20 | 373.46 | <u>None, Connectivity</u> | Double bond         |
| 1.12 | -0.97  | <u>None, None</u> | Double bond | 1.6  | 367.10 | <u>None, Connectivity</u> | Double bond         |
| 1.21 | -52.24 | <u>None, None</u> | Double bond | 1.2  | 351.21 | <u>None, Connectivity</u> | Double bond         |
| 1.15 | -61.24 | <u>None, None</u> | Double bond | 1.12 | 338.39 | <u>None, None</u>         | Amide               |
| 1.5  | -61.74 | <u>None, None</u> | Double bond | 1.3  | 331.36 | <u>None, None</u>         | Ester               |
| 1.3  | -66.73 | <u>None, None</u> | Double bond | 1.4  | 322.81 | <u>None, None</u>         | Double bond         |
|      |        |                   |             | 1.23 | 317.60 | <u>None, Connectivity</u> | Phenol              |
|      |        |                   |             | 1.1  | 274.86 | <u>None, None</u>         | Atom with lone pair |
|      |        |                   |             | 2.2  | 269.87 | <u>None, None</u>         | Atom with lone pair |
|      |        |                   |             | 2.3  | 269.87 | <u>None, None</u>         | Atom with lone pair |
|      |        |                   |             | 1.16 | 262.42 | <u>None, None</u>         | Double bond         |
|      |        |                   |             | 1.11 | 190.58 | <u>None, Connectivity</u> | Double bond         |
|      |        |                   |             | 1.18 | 174.49 | <u>None, None</u>         | Ether               |

Figure S9: Continued.

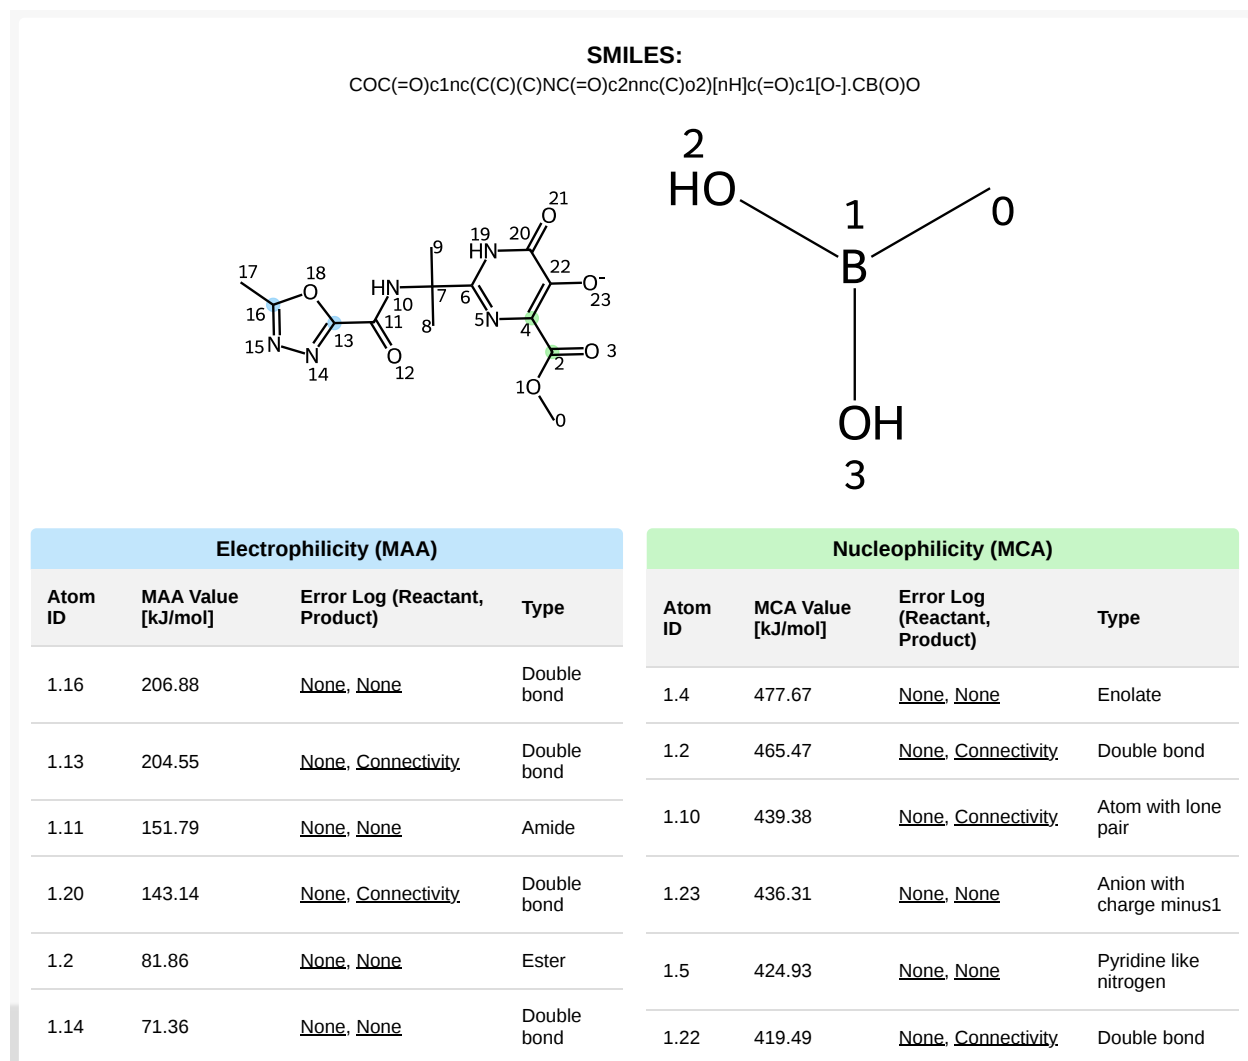

Figure S10: Calculated MAAs and MCAs for the second reaction step in the retrosynthetic route by Manifold (see Figure S4). The atom site 1.23 is deprotonated compared to Figure S6. The MAAs and MCAs are obtained at the r<sup>2</sup>SCAN-3c SMD(DMSO)//GFN1-xTB ALPB(DMSO) level of theory.



|      |         |                           |             |      |        |                           |                        |
|------|---------|---------------------------|-------------|------|--------|---------------------------|------------------------|
| 1.22 | 53.00   | <u>None, None</u>         | Double bond | 1.15 | 418.47 | <u>None, None</u>         | Pyridine like nitrogen |
| 1.6  | 50.60   | <u>None, None</u>         | Double bond | 1.6  | 415.25 | <u>None, None</u>         | Double bond            |
| 1.4  | 34.98   | <u>None, None</u>         | Double bond | 1.14 | 409.38 | <u>None, None</u>         | Pyridine like nitrogen |
| 1.12 | 14.93   | <u>None, None</u>         | Double bond | 1.21 | 388.73 | <u>None, None</u>         | Atom with lone pair    |
| 1.15 | -17.13  | <u>None, Connectivity</u> | Double bond | 1.3  | 381.45 | <u>None, None</u>         | Ester                  |
| 1.5  | -45.17  | <u>None, None</u>         | Double bond | 1.20 | 349.43 | <u>None, Connectivity</u> | Double bond            |
| 1.21 | -77.24  | <u>None, None</u>         | Double bond | 1.12 | 335.83 | <u>None, None</u>         | Amide                  |
| 1.3  | -108.39 | <u>None, None</u>         | Double bond | 1.1  | 332.79 | <u>None, None</u>         | Atom with lone pair    |
|      |         |                           |             | 1.13 | 317.89 | <u>None, None</u>         | Double bond            |
|      |         |                           |             | 1.19 | 309.30 | <u>None, None</u>         | Atom with lone pair    |
|      |         |                           |             | 1.16 | 280.77 | <u>None, None</u>         | Double bond            |
|      |         |                           |             | 2.2  | 269.86 | <u>None, None</u>         | Atom with lone pair    |
|      |         |                           |             | 2.3  | 269.86 | <u>None, None</u>         | Atom with lone pair    |
|      |         |                           |             | 1.11 | 218.05 | <u>None, Connectivity</u> | Double bond            |
|      |         |                           |             | 1.18 | 174.46 | <u>None, None</u>         | Ether                  |

Figure S10: Continued.

## Additional material for the covalent inhibitor reactivity predictions:

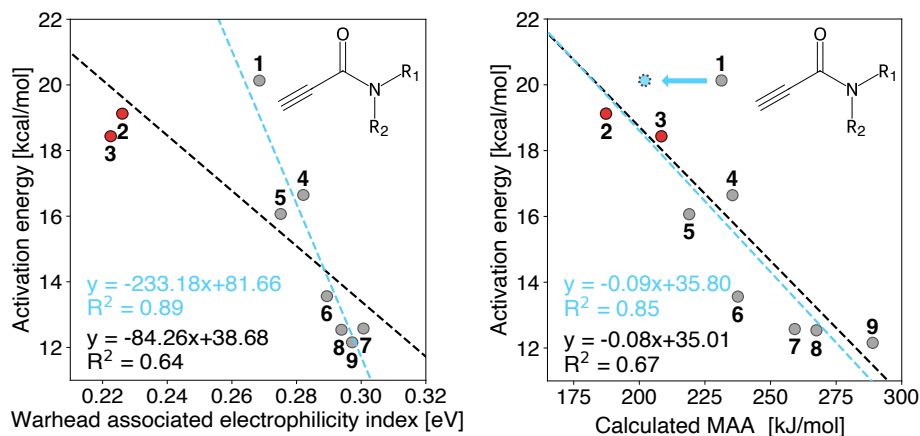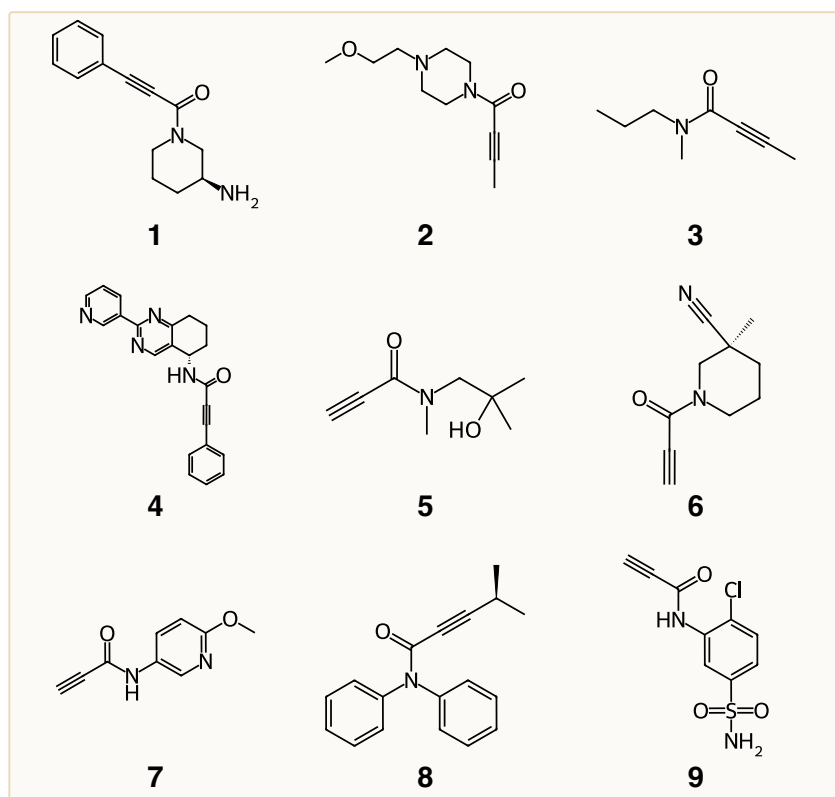

Figure S11: Covalent inhibitor reactivity prediction for 9 different propargylamides. The calculated MAAs are obtained at the  $r^2$ SCAN-3c SMD(DMSO)//GFN1-xTB ALPB(DMSO) level of theory and otherwise  $\omega$ B97XD/cc-pVDZ CPCM(H<sub>2</sub>O). The blue regression lines are defined in the main text. The red dots are considered outliers in the work of Hermann et al.<sup>13</sup>

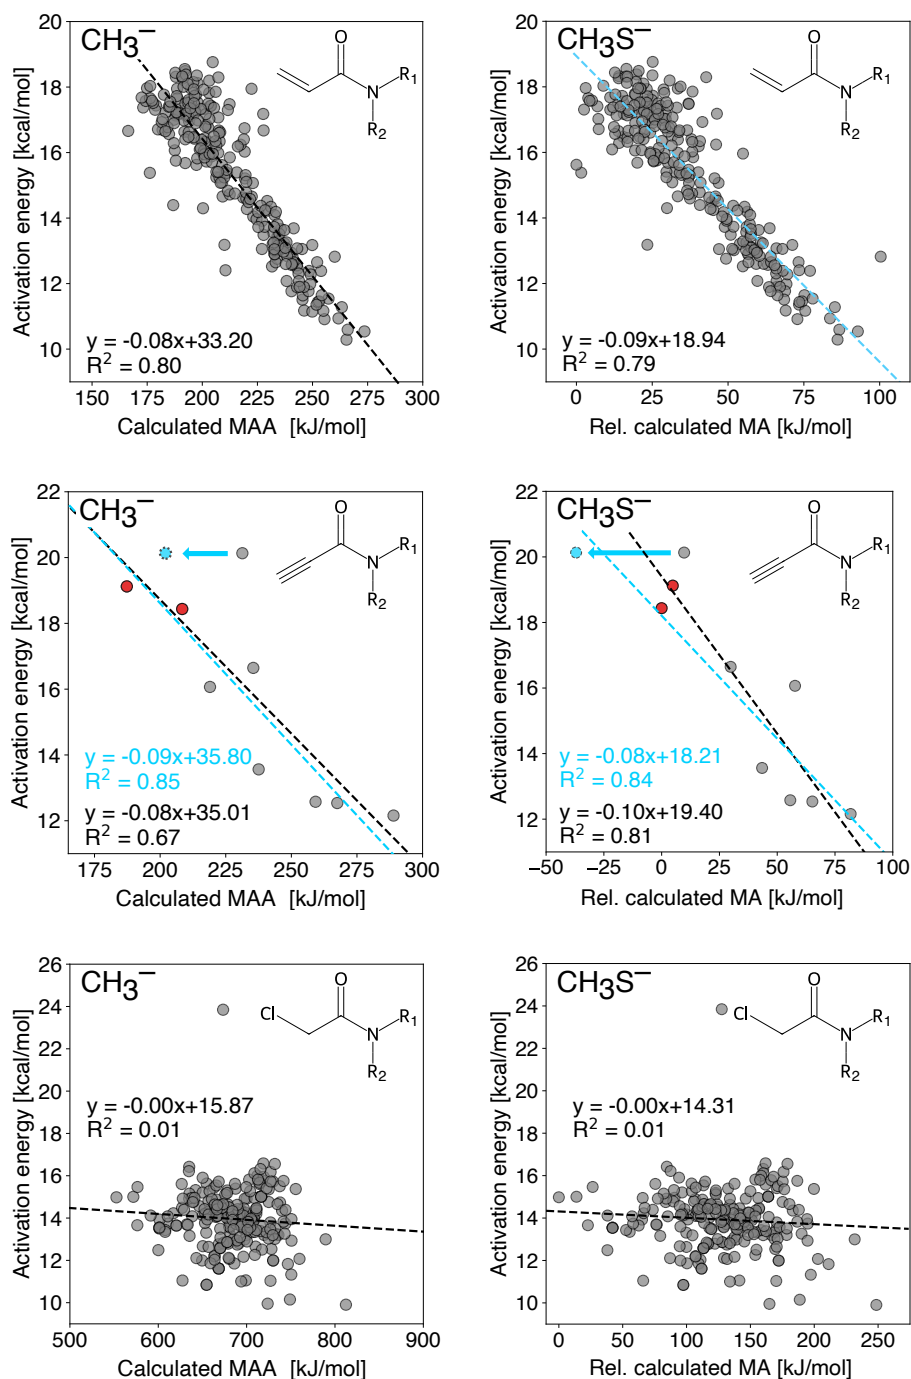

Figure S12: Covalent inhibitor reactivity prediction for various acrylamides (top), propargylamides (middle), and 2-chloroacetamides (bottom). The calculated MAAs (left) and relative methanethiolate affinities (MAs) (right) are obtained at the  $r^2\text{SCAN-3c SMD(DMSO)}/\text{GFN1-xTB ALPB(DMSO)}$  level of theory. The black regression lines consider all points, whereas the blue regression lines are defined in the main text. The red dots are considered outliers in the work of Hermann et al.<sup>13</sup>
